# Supplementary material for: Novel resistance loci for quantitative resistance to Septoria tritici blotch in Asian wheat (Triticum aestivum) via genome-wide association study
Source: Research Square preprint supplement (doi:10.21203/rs.3.rs-4144941/v1), 2024-04-11
Supplement: Supplementary file 1 [file e99ae10f1186d3a53949ec78.xlsx]

## Sheet: S1
	Table S1: Mean AUDPC for Septoria tritici blotch (STB) disease across environments (years) in bread wheat genotypes.
	S No	Code	Cultivar/breeding line	ORIGIN	STB 2019	STB 2020	STB 2021	Mean	Caterorization
	1	IND1	BRW 3792	B2017\INT_IND\1	1019.14	874.074	935.494	942.901	MS
	2	IND2	BRW 3806	B2017\INT_IND\2	618.519	818.827	805.864	747.737	MR
	3	IND3	DBW 14	B2017\INT_IND\3	1559.88	1156.17	1123.46	1279.84	S
	4	IND4	DBW 88	B2017\INT_IND\4	1465.43	1122.84	1136.42	1241.56	S
	5	IND5	DBW 90	B2017\INT_IND\5	974.074	966.975	1030.56	990.535	MS
	6	IND6	DBW107	B2017\INT_IND\6	1250	1106.48	1028.4	1128.29	S
	7	IND7	DBW 150	B2017\INT_IND\7	889.506	600.617	730.247	740.123	MR
	8	IND8	DBW 168	B2017\INT_IND\8	137.037	383.951	596.296	372.428	R
	9	IND9	DBW 173	B2017\INT_IND\9	140.123	1014.51	844.753	666.461	MR
	10	IND10	DBW 187	B2017\INT_IND\10	166.667	1024.38	721.605	637.551	MR
	11	IND11	DBW 189	B2017\INT_IND\11	638.889	820.988	758.333	739.403	MR
	12	IND12	DBW 196	B2017\INT_IND\12	768.827	978.704	892.284	879.938	MR
	13	IND13	DBW 221	B2017\INT_IND\13	1166.05	1071.91	1175.31	1137.76	S
	14	IND14	DBW 222	B2017\INT_IND\14	1026.54	1040.43	926.852	997.942	MS
	15	IND15	DBW 223	B2017\INT_IND\15	1236.11	836.42	1078.09	1050.21	MS
	16	IND16	DBW 233	B2017\INT_IND\16	530.864	579.012	656.79	588.889	R
	17	IND17	DBW 237	B2017\INT_IND\17	1224.38	963.58	1039.2	1075.72	MS
	18	IND18	DBW 246	B2017\INT_IND\18	1047.22	917.284	773.457	912.654	MS
	19	IND19	DBW 247	B2017\INT_IND\19	1174.69	863.272	892.284	976.749	MS
	20	IND20	DBW 248	B2017\INT_IND\20	750.617	830.864	998.148	859.877	MR
	21	IND21	DBW 250	B2017\INT_IND\21	490.741	638.272	734.568	621.193	MR
	22	IND22	DBW 252	B2017\INT_IND\22	748.457	747.531	695.679	730.556	MR
	23	IND25	GW 322	B2017\INT_IND\25	1200	1017.9	1242.28	1153.4	S
	24	IND26	HD 2204	B2017\INT_IND\26	1383.33	1172.84	1084.57	1213.58	S
	25	IND27	HD 2643	B2017\INT_IND\27	707.407	734.568	639.506	693.827	MR
	26	IND28	HD 2824	B2017\INT_IND\28	666.049	724.691	829.63	740.123	MR
	27	IND29	HD 2967	B2017\INT_IND\29	457.099	635.185	553.086	548.457	R
	28	IND30	HD 2985	B2017\INT_IND\30	1258.02	1114.2	1183.95	1185.39	S
	29	IND31	HD 2987	B2017\INT_IND\31	1224.38	1169.44	1253.09	1215.64	S
	30	IND32	HD 3043	B2017\INT_IND\32	654.321	724.691	622.222	667.078	MR
	31	IND33	HD 3118	B2017\INT_IND\33	875	737.037	823.148	811.728	MR
	32	IND34	HD 3171	B2017\INT_IND\34	762.037	778.704	730.247	756.996	MR
	33	IND35	HD 3184	B2017\INT_IND\35	692.901	782.099	725.926	733.642	MR
	34	IND36	HD 3219	B2017\INT_IND\36	1029.01	734.568	760.494	841.358	MR
	35	IND37	HD 3226	B2017\INT_IND\37	832.716	786.42	805.864	808.333	MR
	36	IND38	HD 3232	B2017\INT_IND\38	907.407	850.309	639.506	799.074	MR
	37	IND39	HD 3249	B2017\INT_IND\39	1266.67	1078.4	1058.64	1134.57	S
	38	IND40	HD 3254	B2017\INT_IND\40	837.963	867.901	769.136	825	MR
	39	IND41	HD 3272	B2017\INT_IND\41	458.642	555.247	671.914	561.934	R
	40	IND42	HI 1563	B2017\INT_IND\42	1182.72	976.543	894.444	1017.9	MS
	41	IND43	HI 1612	B2017\INT_IND\43	527.16	561.42	639.506	576.029	R
	42	IND44	HI 1617	B2017\INT_IND\44	972.84	971.296	1004.63	982.922	MS
	43	IND45	HI 1622	B2017\INT_IND\45	1174.69	922.222	1140.74	1079.22	MS
	44	IND46	HI 1628	B2017\INT_IND\46	857.407	779.012	995.988	877.469	MR
	45	IND48	K 0307	B2017\INT_IND\48	1048.77	872.84	903.086	941.564	MS
	46	IND49	K 1315	B2017\INT_IND\49	858.333	903.086	987.346	916.255	MS
	47	IND50	K 1601	B2017\INT_IND\50	891.667	820.988	875	862.551	MR
	48	IND51	K 7903	B2017\INT_IND\51	1654.32	1127.78	1372.42	1384.84	S
	49	IND52	MAGHAR	B2017\INT_IND\52	1266.05	989.815	900.926	1052.26	MS
	50	IND53	K 9107	B2017\INT_IND\53	1097.22	949.691	991.667	1012.86	MS
	51	IND54	KRL 19	B2017\INT_IND\54	1332.1	1062.04	1166.67	1186.93	S
	52	IND55	KRL 210	B2017\INT_IND\55	1001.54	840.432	872.84	904.938	MS
	53	IND56	KRL 213	B2017\INT_IND\56	1047.22	922.531	792.901	920.885	MS
	54	IND57	MACS 9	B2017\INT_IND\57	1206.79	1013.27	1006.79	1075.62	MS
	55	IND58	MP 1201	B2017\INT_IND\58	993.827	1069.75	1106.17	1056.58	MS
	56	IND59	MP 1331	B2017\INT_IND\59	861.728	914.815	1104.01	960.185	MS
	57	IND60	MP 4010	B2017\INT_IND\60	1266.05	1083.95	1244.44	1198.15	S
	58	IND61	NIAW 917	B2017\INT_IND\61	1375.31	1138.89	1140.74	1218.31	S
	59	IND62	NW 1014	B2017\INT_IND\62	1046.91	887.963	1021.91	985.597	MS
	60	IND63	NW 2036	B2017\INT_IND\63	1175.31	1012.96	1183.95	1124.07	S
	61	IND64	WH 1105	B2017\INT_IND\64	709.259	638.272	704.321	683.951	MR
	62	IND65	NW 5054	B2017\INT_IND\65	1014.2	848.457	926.852	929.835	MS
	63	IND66	PBW 677	B2017\INT_IND\66	838.58	863.58	898.765	866.975	MR
	64	IND67	PBW 752	B2017\INT_IND\67	1183.95	995.37	1082.41	1087.24	MS
	65	IND68	PBW 762	B2017\INT_IND\68	1250	1029.63	926.852	1068.83	MS
	66	IND69	PBW 763	B2017\INT_IND\69	1074.38	1024.38	1000.31	1033.02	MS
	67	IND70	PBW 766	B2017\INT_IND\70	997.531	781.481	820.988	866.667	MR
	68	IND71	PBW 769	B2017\INT_IND\71	1158.64	808.951	965.741	977.778	MS
	69	IND72	PBW 771	B2017\INT_IND\72	407.407	522.84	557.407	495.885	R
	70	IND73	PBW 773	B2017\INT_IND\73	916.049	903.086	820.988	880.041	MR
	71	IND74	PBW 778	B2017\INT_IND\74	763.272	1052.16	954.938	923.457	MS
	72	IND75	PBW 800	B2017\INT_IND\75	331.481	598.148	522.84	484.156	R
	73	IND76	PBW 801	B2017\INT_IND\76	1192.59	941.049	983.025	1038.89	MS
	74	IND79	RAJ3765	B2017\INT_IND\79	1175.31	1106.48	1108.33	1130.04	S
	75	IND80	RAJ 4037	B2017\INT_IND\80	1108.33	1124.07	1188.27	1140.23	S
	76	IND81	RAJ 4120	B2017\INT_IND\81	1108.64	932.099	1142.9	1061.21	MS
	77	IND82	SONALIKA	B2017\INT_IND\82	1287.65	1106.48	1175.31	1189.81	S
	78	IND84	UP 2942	B2017\INT_IND\84	831.481	717.284	829.63	792.798	MR
	79	IND85	UP 2950	B2017\INT_IND\85	1030.56	856.79	833.951	907.099	MS
	80	IND86	CBW 38	B2017\INT_IND\86	716.049	510.802	563.889	596.914	R
	81	IND87	UP 2981	B2017\INT_IND\87	732.716	799.074	805.864	779.218	MR
	82	IND88	UP 2993	B2017\INT_IND\88	603.704	588.272	626.543	606.173	MR
	83	IND89	VL 829	B2017\INT_IND\89	663.889	670.679	987.346	773.971	MR
	84	IND90	VL 907	B2017\INT_IND\90	996.914	879.938	875	917.284	MS
	85	IND91	WB 2	B2017\INT_IND\91	675.617	640.123	648.148	654.63	MR
	86	IND92	WH 1218	B2017\INT_IND\92	377.778	277.16	455.864	370.267	R
	87	IND93	WH 1235	B2017\INT_IND\93	716.667	519.753	635.185	623.868	MR
	88	IND94	WR 544	B2017\INT_IND\94	1294.75	933.951	1266.05	1164.92	S
	89	BGD1	BAW-1208	B2018\INT_BGD\1	1162.04	1175.93	993.827	1110.6	MS
	90	BGD2	BAW-1243	B2018\INT_BGD\2	747.531	661.111	708.642	705.761	MR
	91	BGD3	BAW-1254	B2018\INT_BGD\3	966.667	1118.52	911.728	998.971	MS
	92	BGD4	BAW-1272	B2018\INT_BGD\4	978.704	1079.63	741.049	933.128	MS
	93	BGD5	BAW-1280	B2018\INT_BGD\5	1040.12	951.852	591.975	861.317	MR
	94	BGD6	BAW-1286	B2018\INT_BGD\6	1050.31	930.247	838.272	939.609	MS
	95	BGD7	BAW-1147	B2018\INT_BGD\7	1115.12	1201.85	929.012	1082	MS
	96	BGD8	BAW-1300	B2018\INT_BGD\8	763.272	872.84	682.716	772.942	MR
	97	BGD9	BAW-1290	B2018\INT_BGD\9	1102.47	1122.84	993.827	1073.05	MS
	98	BGD10	BAW-1293	B2018\INT_BGD\10	1417.9	1175.93	967.901	1187.24	S
	99	BGD11	BAW-1295	B2018\INT_BGD\11	954.63	684.877	674.074	771.193	MR
	100	BGD12	BAW-1296	B2018\INT_BGD\12	1094.44	827.469	643.827	855.247	MR
	101	BGD13	BAW-1297	B2018\INT_BGD\13	1298.15	1299.38	913.889	1170.47	S
	102	BGD14	BAW-1299	B2018\INT_BGD\14	991.358	1008.02	706.481	901.955	MS
	103	BGD15	BAW-1303	B2018\INT_BGD\15	1163.89	1016.67	931.173	1037.24	MS
	104	BGD16	BAW-1304	B2018\INT_BGD\16	1047.53	1052.16	907.407	1002.37	MS
	105	BGD17	BAW-1316	B2018\INT_BGD\17	1079.01	1125	1037.04	1080.35	MS
	106	BGD19	BAW-1318	B2018\INT_BGD\19	689.815	871.914	840.432	800.72	MR
	107	BGD20	PRODIP/BAW 972	B2018\INT_BGD\20	937.963	1001.54	827.469	922.325	MS
	108	BGD21	BL3063/BARI GOM 27	B2018\INT_BGD\21	1135.8	966.975	712.963	938.58	MS
	109	BGD22	BAW 65//BAW 968/SHTB	B2018\INT_BGD\22	1123.15	1096.6	792.901	1004.22	MS
	110	BGD23	BL3503/3/OASIS/3*ANGRA//708E	B2018\INT_BGD\23	1070.99	1162.96	993.827	1075.93	MS
	111	BGD24	BL3503/3/OASIS/3*ANGRA//708E	B2018\INT_BGD\24	1135.8	1150.93	931.173	1072.63	MS
	112	BGD25	BL3503/3/OASIS/3*ANGRA//708E	B2018\INT_BGD\25	1083.64	1025.31	929.012	1012.65	MS
	113	BGD26	SUFI/PRODIP//BAW 972	B2018\INT_BGD\26	1186.73	1138.89	883.642	1069.75	MS
	114	BGD27	BL3503/6/CS/TH.SC//3*PVN/3/MIRLO/BUC/4/MILAN/5/TILHI	B2018\INT_BGD\27	1167.9	1114.2	710.802	997.634	MS
	115	BGD28	BIJOY/GAA	B2018\INT_BGD\28	983.333	919.444	900.926	934.568	MS
	116	BGD29	BIJOY/GAA	B2018\INT_BGD\29	1026.85	967.901	769.136	921.296	MS
	117	BGD30	BIJOY//GOURAB/FANG60	B2018\INT_BGD\30	844.136	892.284	872.84	869.753	MR
	118	BGD31	PRODIP/FRANCOLIN #1	B2018\INT_BGD\31	898.457	862.963	689.198	816.872	MR
	119	BGD32	PRODIP/FRANCOLIN #1	B2018\INT_BGD\32	1063.58	1106.48	829.63	999.897	MS
	120	BGD33	PRODIP/BAW 1059	B2018\INT_BGD\33	1039.51	1014.51	944.136	999.383	MS
	121	BGD34	PRODIP/BAW 1059	B2018\INT_BGD\34	777.16	895.062	849.074	840.432	MR
	122	BGD35	BAW 1027/BAW 1059/3/OASIS/3*ANGRA//708E	B2018\INT_BGD\35	905.864	794.444	710.802	803.704	MR
	123	BGD36	BAJ #1/CIRO16	B2018\INT_BGD\36	978.086	1083.95	790.741	950.926	MS
	124	BGD37	ATTILA*2/HUITES//FINSI/3/ATTILA*2/PBW65/4/TRCH/CID352570-0BOL//KACHU	B2018\INT_BGD\37	899.074	872.84	773.457	848.457	MR
	125	BGD38	SOURAV/4/PFAU/SERI.1B//AMAD/3/WAXWING	B2018\INT_BGD\38	923.148	1104.32	1034.88	1020.78	MS
	126	BGD39	SOURAV/4/PFAU/SERI.1B//AMAD/3/WAXWING	B2018\INT_BGD\39	810.802	912.654	760.494	827.984	MR
	127	BGD40	SOURAV/4/PFAU/SERI.1B//AMAD/3/WAXWING	B2018\INT_BGD\40	903.704	970.37	922.531	932.202	MS
	128	BGD41	SOURAV/4/PFAU/SERI.1B//AMAD/3/WAXWING	B2018\INT_BGD\41	998.765	1121.6	838.272	986.214	MS
	129	BGD42	SOURAV/3/HUW234+LR34/PRINIA//KRONSTAD F2004	B2018\INT_BGD\42	751.852	833.025	741.049	775.309	MR
	130	BGD43	SOURAV/3/HUW234+LR34/PRINIA//KRONSTAD F2004	B2018\INT_BGD\43	757.099	855.864	760.494	791.152	MR
	131	BGD44	SOURAV/3/HUW234+LR34/PRINIA//KRONSTAD F2004	B2018\INT_BGD\44	709.877	776.235	630.864	705.658	MR
	132	BGD45	SOURAV/3/HUW234+LR34/PRINIA//KRONSTAD F2004	B2018\INT_BGD\45	975.309	1064.2	805.864	948.457	MS
	133	BGD46	SOURAV/3/HUW234+LR34/PRINIA//KRONSTAD F2004	B2018\INT_BGD\46	1078.4	951.852	851.235	960.494	MS
	134	BGD47	SOURAV/3/HUW234+LR34/PRINIA//KRONSTAD F2004	B2018\INT_BGD\47	931.173	802.469	741.049	824.897	MR
	135	BGD48	SOURAV/3/HUW234+LR34/PRINIA//KRONSTAD F2004	B2018\INT_BGD\48	770.37	804.938	708.642	761.317	MR
	136	BGD49	SOURAV/3/HUW234+LR34/PRINIA//KRONSTAD F2004	B2018\INT_BGD\49	1034.88	995.988	842.593	957.819	MS
	137	BGD50	GOURAB/3/HUW234+LR34/PRINIA//KRONSTAD F2004	B2018\INT_BGD\50	1068.52	1134.88	827.469	1010.29	MS
	138	BGD51	CHIR7/ANB//CHIR1	B2018\INT_BGD\51	528.086	573.148	563.889	555.041	R
	139	BGD52	CHIR7/ANB//CHIR1	B2018\INT_BGD\52	184.568	444.444	440.741	356.584	R
	140	BGD53	CHIR7/ANB//CHIR1	B2018\INT_BGD\53	574.506	600.617	561.907	579.01	R
	141	BGD54	CHIR7/ANB//CHIR1	B2018\INT_BGD\54	219.753	451.235	438.58	369.856	R
	142	BGD55	CHIR7/ANB//CHIR1	B2018\INT_BGD\55	590.741	579.938	531.481	567.387	R
	143	BGD56	BIJOY/SHA3/4/SERI//SHA4/LIRA/3/CHIR1	B2018\INT_BGD\56	1178.4	1095.68	1099.69	1124.59	S
	144	BGD57	BIJOY/SHA3/4/SERI//SHA4/LIRA/3/CHIR1	B2018\INT_BGD\57	1101.85	1029.63	909.568	1013.68	MS
	145	BGD58	BIJOY/3/EMB16/CBRD//CBRD	B2018\INT_BGD\58	1014.81	1049.07	881.481	981.79	MS
	146	BGD59	BIJOY*2/BAW 996	B2018\INT_BGD\59	1174.07	1201.85	1058.64	1144.86	S
	147	BGD60	BIJOY*2/BAW 996	B2018\INT_BGD\60	1066.36	1118.52	849.074	1011.32	MS
	148	BGD61	BIJOY*2/BAW 996	B2018\INT_BGD\61	1022.84	862.037	710.802	865.226	MR
	149	BGD62	BARI GOM 26/BAW 1035	B2018\INT_BGD\62	907.099	1201.85	851.235	986.728	MS
	150	BGD63	BARI GOM 26/BAW 1035	B2018\INT_BGD\63	1026.85	1052.47	702.16	927.16	MS
	151	BGD64	BAW 1129/BIJOY	B2018\INT_BGD\64	894.444	940.123	887.963	907.51	MS
	152	BGD65	PRODIP/4/PFAU/SERI.1B//AMAD/3/WAXWING	B2018\INT_BGD\65	658.642	487.654	531.481	559.259	R
	153	BGD66	PRODIP/4/PFAU/SERI.1B//AMAD/3/WAXWING	B2018\INT_BGD\66	542.593	349.383	732.407	541.461	R
	154	BGD67	KANCHAN//IAS63/ALDAN	B2018\INT_BGD\67	814.198	1010.19	788.58	870.988	MR
	155	BGD68	SOURAV/BAW 1037	B2018\INT_BGD\68	923.148	838.272	784.259	848.56	MR
	156	BGD69	SOURAV/BAW 1055	B2018\INT_BGD\69	998.765	962.654	795.062	918.827	MS
	157	BGD70	SOURAV/BAW 1055	B2018\INT_BGD\70	1042.9	1080.56	829.63	984.362	MS
	158	BGD71	SOURAV/BAW 1055	B2018\INT_BGD\71	1009.88	929.321	842.593	927.263	MS
	159	BGD72	BIJOY/BARI GOM 28	B2018\INT_BGD\72	1000	1108.64	911.728	1006.79	MS
	160	BGD73	BIJOY/BARI GOM 28	B2018\INT_BGD\73	915.123	820.988	779.938	838.683	MR
	161	BGD74	BIJOY/BARI GOM 28	B2018\INT_BGD\74	891.049	808.951	602.778	767.593	MR
	162	BGD75	BARI GOM 26/3/OASIS/3*ANGRA//708E	B2018\INT_BGD\75	1242.59	1159.88	840.432	1080.97	MS
	163	BGD76	BAW 1064/3/OASIS/3*ANGRA//708E	B2018\INT_BGD\76	1258.95	1157.41	944.136	1120.16	S
	164	BGD77	BARI GOM 26/3/OASIS/3*ANGRA//708E	B2018\INT_BGD\77	802.778	872.84	691.358	788.992	MR
	165	BGD78	GOURAB/FANG60//BAW 1037	B2018\INT_BGD\78	676.852	680.556	604.938	654.115	MR
	166	BGD79	GOURAB/FANG60//BAW 1037	B2018\INT_BGD\79	775.926	635.185	596.296	669.136	MR
	167	BGD80	GOURAB/FANG60//BAW 1037	B2018\INT_BGD\80	704.938	700	700	701.646	MR
	168	BGD81	GOURAB/FANG60//BAW 1037	B2018\INT_BGD\81	626.235	591.975	589.815	602.675	MR
	169	BGD82	BJY/3/OASIS/3*ANGRA//708E	B2018\INT_BGD\82	982.716	920.988	814.506	906.07	MS
	170	BGD83	PRODIP/3/BL 1724/BL1887//BL2031	B2018\INT_BGD\83	1042.9	1105.56	827.469	991.975	MS
	171	BGD84	PRODIP/3/BL 3373//BL1923/NL 876	B2018\INT_BGD\84	665.123	870.988	704.321	746.811	MR
	172	BGD85	KANCHAN/3/FANG60//RL6043/4*NAC/4/BIJOY	B2018\INT_BGD\85	958.642	1073.46	723.765	918.621	MS
	173	BGD86	CHIPAK	B2018\INT_BGD\86	444.444	612.346	401.852	486.214	R
	174	BGD87	MUCUY	B2018\INT_BGD\87	533.951	524.691	643.827	567.49	R
	175	BGD88	CAL/NH//H567.71/3/SERI/4/CAL/NH//H567.71/5/2*KAUZ/6/WH576/7/WH 542/8/WAXWING/9/ATTILA*2/PBW65//PIHA/3/ATTILA/2*PASTOR/10/UP2338*2/KKTS*2//YANAC	B2018\INT_BGD\88	646.605	741.975	553.086	647.222	MR
	176	BGD89	ELVIRA/CHIBIA//CID391534-0AUS/4/2*MARCHOUCH*4/SAADA/3/2*FRET2/KUKUNA//FRET2	B2018\INT_BGD\89	682.099	934.568	926.852	847.84	MR
	177	BGD90	SOKOLL/WESTONIA	B2018\INT_BGD\90	435.802	644.136	522.84	534.259	R
	178	BGD91	PUB94.15.1.12/WBLL1	B2018\INT_BGD\91	730.247	744.753	594.136	689.712	MR
	179	BGD92	BORLAUG100 F2014	B2018\INT_BGD\92	832.099	860.494	706.481	799.691	MR
	180	BGD93	NAVJ07/4/68.111/RGB-U//WARD/3/AE.SQUARROSA (501)	B2018\INT_BGD\93	369.136	642.593	712.963	574.897	R
	181	BGD94	NAVJ07/3/GARZA/BOY//AE.SQUARROSA (1037)	B2018\INT_BGD\94	731.79	776.543	678.395	728.909	MR
		R Check			122.222	187.654	198.765	169.547	R
		S Check			1113.89	1180.86	1261.73	1185.49	S

## Sheet: S2
Table S2: Descriptive statistic of Septoria tritici Blotch value from GWAS panel evaluated in three years during 2019 to 2021 growing season.
Trait	Environment	Mean	Minimum	Maximum	Standard Deviation
DH (days)	2019	66.82	57	95	5.48
	2020	64.04	58	78	3.76
	2021	67.81	56	80	4.04
PH (cm)	2019	93.09	65	125	8.7
	2020	99.64	75	130	7.85
	2021	101.7	81	125	7.44
STB (AUDPC)	2019	918.74	137.04	1654.32	290.24
	2020	893.55	277.16	1299.38	211.13
	2021	839.06	401.85	1372.41	210.95
DH= days to heading; PH= plant height; STB= Septoria tritici blotch; AUDPC= area under the disease progress curve

## Sheet: S3
Table S3: Genotypic variance and heritability in the broad sense (h2) for phenotypic traits in 181 wheat genotypes in three years.
Trait	2019		2020		2021
	Genotypic variance	h2	Genotypic variance	h2	Genotypic variance	h2
DH	17.96**	0.75	6.51**	0.63	13.16**	0.92
PH	60.07**	0.88	35.75**	0.73	48.37**	0.95
STB	67044.84**	0.88	35371.61**	0.88	26427.29**	0.75
DH= days to heading; PH= plant height; STB= Septoria tritici blotch;
**Significant at p<0.01

## Sheet: S4
	Table S4: Summary of linkage disequilibrium analysis among marker pairs and the number of significant marker pairs per chromosome and genome.
	Chromosome	TNMP	r2	Distance (Mbp)	Significant marker pairs at p,0.01 (%)	r2 (%)
	1A	14425	0.16	425.43	6,544 (45.37)	16
	1B	18776	0.08	292.79	6,443 (34.32)	8
	1D	6475	0.15	386.15	1,880 (29.03)	15
	2A	22475	0.22	339.59	10,086 (44.88)	22
	2B	28425	0.14	298.72	12,740 (44.82)	14
	2D	11925	0.24	496.88	4,491 (37.66)	24
	3A	15825	0.1	526.13	5,645 (35.67)	10
	3B	19475	0.12	437.77	7,524 (38.63)	12
	3D	5425	0.06	543.57	8,36 (15.41)	6
	4A	11775	0.15	545.1	5,098 (43.30)	15
	4B	7125	0.11	487.66	2,573 (36.11)	11
	4D	1081	0.04	513.32	1,62 (14.99)	4
	5A	15875	0.1	419.38	5,162 (32.52)	10
	5B	24025	0.13	314.31	5,638 (23.47)	13
	5D	4825	0.07	450.11	9,08 (18.82)	7
	6A	13725	0.11	411.5	4,712 (34.33)	11
	6B	20075	0.15	329.18	7,920 (39.45)	15
	6D	3975	0.05	468.43	6,22 (15.65)	5
	7A	22025	0.11	415.69	7,174 (32.57)	11
	7B	24725	0.14	344.26	10,141 (41.02)	14
	7D	6875	0.05	487.56	7,85 (11.42)	5
	A genome	116125	0.14	440.4	44,421.00 (38.25)
	B genome	142626	0.12	357.81	52,979.00 (37.15)
	D genome	40581	0.09	478	9,684.00 (23.86)
	Total	299332	0.12	425.41	107,084.00 (35.77)
	TNMP=total number of marker pairs; Mbp=mega-base pair

## Sheet: S5
	Table S5: All quantitative trait SNPs (QTNs) controlling the Septoria tritici blotch resistance.
	S No.	Trait	Marker	QTSs	Chromosome	Position	F	p	MarkerR2	Genetic Var	-log10pvalue
	1	STBm	997942	Q.STB.1A.1	1A	370228607	14.2731	0.00022498	0.08291	20346.9	3.64786
	2	STB21	5355343	Q.STB.1A.2	1A	555693545	23.3683	3.0426e-06	0.12307	11587.3	5.51676
	3	STB19	3034508	Q.STB.1A.3	1A	582959772	12.9623	0.00051221	0.11532	6932.35	3.29055
	4	STB21	3385482	Q.STB.1B.1	1B	570759883	16.0588	0.00011694	0.13075	11879.2	3.93204
	5	STBm	1093490	Q.STB.1B.2	1B	572985684	12.2451	0.00062971	0.07875	13079.2	3.20086
	6	STB20	1090302	Q.STB.1B3	1B	579824305	13.3093	0.00035825	0.07557	22486	3.44581
	7	STB19	3064683	Q.STB.1D.1	1D	44775232	13.1594	0.00049	0.11724	0.55502	3.3098
	8	STB21	1026699	Q.STB.2A.1	2A	11695202	11.2918	0.00101	0.07682	15869.7	2.99568
	9	STB19	3955868	Q.STB_DH 2A.1	2A	106815147	29.2743	2.0678e-07	0.14214	19318.6	6.68449
	10	STB19	1231823	Q.STB.2A.2	2A	147865042	10.9469	0.00116	0.06323	27336.9	2.93554
	11	STB19	1091069	Q.STB.2A.3	2A	528700315	16.807	6.4471e-05	0.0898	20919.7	4.19064
	12	STB21	989588	Q.STB.2A.4	2A	666154770	26.5925	1.587e-06	0.22718	1912.9	5.79942
	13	STB21	1205938	Q.STB.2A.5	2A	737628168	10.4588	0.00148	0.06145	20064	2.82974
	14	STB19	1060943	Q.STB.2A.6	2A	763087785	13.4797	0.00035189	0.09192	22820.4	3.45359
	15	STB19	1101257	Q.STB.2A.7	2A	764311151	13.9025	0.00028315	0.09122	21446.2	3.54798
	16	STB20	7865016	Q.STB.2A.8	2A	776999671	10.8854	0.00122	0.06827	24004.5	2.91364
	17	STB21	1862723	Q.STB.2A.9	2A	779028972	22.5085	4.4127e-06	0.11634	13988.1	5.3553
	18	STB21	12009940	Q.STB.2B.1	2B	11710780	12.8713	0.00055973	0.12934	9027.53	3.25202
	19	STB21	3028021	Q.STB.2B.2	2B	453665747	19.8352	1.5557e-05	0.10748	14700.2	4.80807
	20	STB21	1024643	Q.STB.2B.3	2B	471533746	21.3546	7.6288e-06	0.1134	13644.9	5.11754
	21	STB21	3026452	Q.STB.2B.4	2B	812292519	27.367	6.5535e-07	0.17215	15262.9	6.18353
	22	STB21	1725789	Q.STB.3A.1	3A	716807570	11.7941	0.00078648	0.07838	8495.33	3.10431
	23	STB21	1059080	Q.STB_DH.3B.2	3B	680375512	13.0587	0.00039672	0.07068	14682.8	3.40152
	24	STB21	1037234	Q.STB.3B.1	3B	681714448	16.3999	7.818e-05	0.08853	12321.1	4.1069
	25	STB21	1076556	Q.STB.3B.2	3B	682688048	12.3039	0.00064041	0.09397	5729.66	3.19354
	26	STB21	1092165	Q.STB.3B.3	3B	844294396	21.3552	9.8895e-06	0.15123	6054.6	5.00483
	27	STB21	2251455	Q.STB.3D.1	3D	51815343	11.4225	0.00107	0.11114	15403.7	2.97062
	28	STB21	1022931	Q.STB.3D.2	3D	468241526	22.3416	4.7647e-06	0.11565	13168.6	5.32196
	29	STB21	5411528	Q.STB.3D.3	3D	562308599	21.6981	6.6727e-06	0.11848	14733.4	5.1757
	30	STB21	1024214	Q.STB.3D.4	3D	585088524	21.7087	6.4281e-06	0.11379	13409.5	5.19192
	31	STB21	3222371	Q.STB.3D.5	3D	602416939	15.5728	0.00014684	0.13047	10046.8	3.83316
	32	STB21	1091463	Q.STB.4A.1	4A	321068650	21.8911	6.161e-06	0.12084	14227.4	5.21035
	33	STB21	1108063	Q.STB.4A.2	4A	621300773	16.3193	0.00010326	0.13498	10972.4	3.98607
	34	STB21	1092528	Q.STB.4B.1	4B	22704276	10.5506	0.00143	0.06498	17801.9	2.84466
	35	STB21	3952105	Q.STB.4B.2	4B	196765984	14.7313	0.00019142	0.09934	12264	3.71801
	36	STB21	1075213	Q.STB.4B.3	4B	459129205	20.0911	1.428e-05	0.11428	11405.6	4.84527
	37	STB20	995502	Q.STB.5A.1	5A	36538241	19.2373	2.0853e-05	0.10462	22936.9	4.68083
	38	STB20	1228444	Q.STB.5A.2	5A	37896699	16.6793	6.9052e-05	0.09046	24262.1	4.16082
	39	STB20	989815	Q.STB.5A.3	5A	38613021	11.7719	0.00075786	0.06428	22133.5	3.12041
	40	STB21	7354082	Q.STB.5A.4	5A	125662272	12.2334	0.0006201	0.07591	15393.4	3.20754
	41	STB21	1023146	Q.STB.5A.5	5A	417225903	19.2214	3.9533e-05	0.20859	12727.9	4.40304
	42	STB19	5411867	Q.STB_DH.5A.3	5A	588454993	12.011	0.00067514	0.06702	21029.4	3.17061
	43	STB19	1106357	Q.STB.5A.6	5A	590251199	11.0882	0.00111	0.07304	22600.3	2.95468
	44	STB21	1023448	Q.STB.5A.7	5A	632866685	14.1351	0.00029544	0.12958	13617.2	3.52953
	45	STB21	3956846	Q.STB.5A.8	5A	690569043	11.2342	0.00117	0.10752	17120.6	2.93181
	46	STB20	1122319	Q.STB.5B.1	5B	49925060	19.1059	2.3351e-05	0.11234	26124.9	4.63169
	47	STB19	5577028	Q.STB.5B.2	5B	79082406	12.1297	0.00070072	0.09266	23108.6	3.15446
	48	STBm	3222429	Q.STB.5B.3	5B	244491166	16.5494	7.7525e-05	0.10041	16207	4.11056
	49	STB19	992847	Q.STB.5B.4	5B	459683061	10.8583	0.00144	0.10963	10966.4	2.84164
	50	STB21	1019948	Q.STB.5D.1	5D	382058033	13.5856	0.00039126	0.12811	17976.8	3.40753
	51	STB19	1218077	Q.STB_DH.5D.4	5D	545847641	10.5972	0.00142	0.06897	23445.1	2.84771
	52	STB21	1273651	Q.STB.5D.2	5D	553570683	20.0138	1.4315e-05	0.10822	14018.3	4.84421
	53	STB21	2258509	Q.STB.6A.1	6A	600737360	21.9007	6.9796e-06	0.14017	11651.3	5.15617
	54	STB21	1863926	Q.STB.6A.2	6A	607033164	11.3082	0.00095922	0.06391	19070.8	3.01808
	55	STB21	1089240	Q.STB.6A.3	6A	614688143	13.5379	0.00031404	0.07382	17113.7	3.50302
	56	STB21	3025570	Q.STB.6B.1	6B	599648378	18.2427	3.4375e-05	0.10745	16690.4	4.46376
	57	STB21	1025472	Q.STB.6D.1	6D	9855559	17.7803	4.329e-05	0.10791	15512.3	4.36361
	58	STB21	1210314	Q.STB.6D.2	6D	105735432	18.7595	2.721e-05	0.11117	10689.9	4.56527
	59	STB20	2282774	Q.STB.7A.1	7A	20375244	13.8393	0.00032179	0.11482	21025.1	3.49243
	60	STB21	3954175	Q.STB.7A.2	7A	82358398	12.5343	0.00056958	0.0918	14797.4	3.24445
	61	STB21	3222181	Q.STB.7A.3	7A	705651886	15.9544	0.00015162	0.16366	22478.8	3.81924
	62	STB20	1109521	Q.STB.7B.1	7B	26496726	12.0482	0.00080929	0.11524	21136	3.0919
	63	STB19	1228174	Q.STB.7B.2	7B	68307597	13.1617	0.00038	0.07229	23307.8	3.42022
	64	STB21	993049	Q.STB.7B.3	7B	254295433	17.7784	4.1651e-05	0.10059	14265.6	4.38037
	65	STB19	1137091	Q.STB.7B.4	7B	542308851	10.9685	0.00125	0.08723	15457.6	2.90309
	66	STB21	5412082	Q.STB.7D.1	7D	94834780	11.2323	0.00124	0.12198	12211.3	2.90658
	67	STB21	1024820	Q.STB.7D.2	7D	182602328	18.7553	2.6048e-05	0.10325	12002.1	4.58423
	68	STB21	988771	Q.STB.7D.3	7D	256484812	15.3487	0.00013184	0.0865	15396	3.87995
	69	STB21	2265463	Q.STB.7D.4	7D	426732623	12.9231	0.00050388	0.1108	14084.4	3.29767
	70	STBm	2273491	Q.STB.7D.5	7D	556224991	13.1454	0.00041357	0.09115	18383.9	3.38345
	71	STB19	1089389		UNKNOWN	0	15.4427	0.0001469	0.11656	16364.9	3.83298
	72	STB21	1096246		UNKNOWN	0	10.9997	0.00125	0.09136	14100	2.90309
	73	STB19	1111243		UNKNOWN	0	13.5882	0.00039523	0.12326	44703.9	3.40315
	74	STB21	1207181		UNKNOWN	0	16.7126	8.3446e-05	0.13138	16415.5	4.07859
	75	STB20	1209118		UNKNOWN	0	15.0122	0.00015999	0.08958	26391	3.79591
	76	STB20	1210686		UNKNOWN	0	12.0209	0.00074937	0.09618	21524.5	3.1253
	77	STB21	13881331		UNKNOWN	0	14.1114	0.00029711	0.12443	17342.5	3.52708
	78	STB21	16327918		UNKNOWN	0	13.3205	0.00046952	0.13951	15416.2	3.32835
	79	STB20	3024712		UNKNOWN	0	14.4516	0.0002041	0.08103	24340.4	3.69016
	80	STB21	3026929		UNKNOWN	0	24.7562	1.9459e-06	0.15213	10411.7	5.71088
	81	STB20	3064461		UNKNOWN	0	23.3469	3.7199e-06	0.14638	17847.1	5.42947
	82	STB21	3064840		UNKNOWN	0	11.6395	0.00116	0.14779	7634.28	2.93554
	83	STB21	3222497		UNKNOWN	0	22.6248	4.1494e-06	0.11575	13133.8	5.38201
	84	STB21	3385476		UNKNOWN	0	10.7805	0.00136	0.08375	12164.8	2.86646
	85	STB21	3944879		UNKNOWN	0	11.877	0.00072398	0.06787	14875.2	3.14027
	86	STB19	3951489		UNKNOWN	0	14.6215	0.00020628	0.10189	45616.1	3.68554
	87	STB21	3952538		UNKNOWN	0	18.7384	4.6329e-05	0.19842	12022.4	4.33415
	88	STB21	3954969		UNKNOWN	0	23.6116	2.724e-06	0.12475	13508.4	5.56479
	89	STB21	4009206		UNKNOWN	0	25.1632	1.3438e-06	0.13095	12885.9	5.87167
	90	STB20	4537276		UNKNOWN	0	14.5964	0.00021319	0.1073	19641.8	3.67123
	91	STB20	4541969		UNKNOWN	0	10.6899	0.00136	0.06943	23996.9	2.86646
	92	STB21	4989430		UNKNOWN	0	10.9878	0.00127	0.09688	21730.5	2.8962
	93	STB19	4990428		UNKNOWN	0	12.2459	0.00074111	0.11256	852.07	3.13012
	94	STB21	5578076		UNKNOWN	0	19.4678	1.823e-05	0.10329	13751.1	4.73921
	95	STB21	5580090		UNKNOWN	0	16.6942	7.8604e-05	0.11829	16307.3	4.10456
	96	STBm	5580588		UNKNOWN	0	11.2439	0.00114	0.10231	18390.1	2.9431
	97	STB21	5582547		UNKNOWN	0	23.2881	3.1003e-06	0.12046	14286.2	5.5086
	98	STB21	7352295		UNKNOWN	0	21.3275	8.081e-06	0.11968	14170.3	5.09253
	99	STB21	7353288		UNKNOWN	0	20.6097	1.3848e-05	0.14977	10314.2	4.85861
		*Blue are pleiotropic

## Sheet: S6
	Table S6: The repetitive quatitative trait SNPs (QTNs) controlling the Septoria tritici blotch resistance and the putative candidate genes covering the flanking region of repetitive QTNs
	S no.	QTSs	Snp/allele ID	Position	P. Value	Marker R2	Experiment	Transcript ID	Protein/factors/activity	Chromosome location	Role	Reference
	1	Q.STB.1A.1	997942	370228607	2.25E-04 to 3.52E-04	0.08291 to 0.07845	STB19 and STBm	TraesCS1A02G208700	Guanyl-nucleotide exchange factor activity	Chromosome 1A: 370,108,509-370,111,042 reverse strand.	Immune response to rice blast disease	Yu et al., 2021	3.65-3.45
											Potential candidates for wheat powdery mildew resistance	Hu et al., 2020
									L-leucine transaminase activity,	Chromosome 1A: 370,092,549-370,097,701 forward strand.	Association between the levels of Valine, Leucine, and Isoleucine with resistance to yellow rust infection in wheat.	Moreno et al., 2021
								TraesCS1A02G208500	L-valine transaminase activity, L-isoleucine transaminase activity, catalytic activity, branched-chain-amino-acid transaminase activity, catalytic activity	Chromosome 1A: 370,092,549-370,097,701 forward strand.	L-leucine transaminase activity, L-valine transaminase activity
	2	Q.STB.1B.2	1093490	572985684	6.30E-04 to 0.000721	0.07875 to 0.07677	STB19 and STBm	TraesCS1B02G344600	Protein binding	Chromosome 1B: 573,041,761-573,043,761 forward strand.	Pathogenesis Related-1 proteins represent a large family (23 in wheat) of proteins that are upregulated early in the defence response.	Breen et al., 2016	3.20-3.14
								TraesCS1B02G344900	Inositol tetrakisphosphate 1-kinase activity, metal ion binding, magnesium ion binding	Chromosome 1B: 573,079,598-573,080,914 reverse strand	Plants defective in synthesis of myo-inositol and myo-inositol, hexakisphosphate are more susceptible to disease, including viral, bacterial and fungal pathogen infection	Murphy et al., 2008
								TraesCS1B02G345000	Serine-type carboxypeptidase activity	Chromosome 1B: 573,215,703-573,219,206 forward strand.	Broad-spectrum disease resistance in cereals	Papadopoulou et al (1999)
	3	Q.STB.1B3	1090302	579824305	0.000358 to 9.47E-04	0.06594 to 0.07557	STB20 and STBm	TraesCS1B02G349300	Translation initiation factor activity, GTPase activity,hydrolase activity, tRNA binding	Chromosome 1B: 579,788,398-579,793,281 reverse strand.	The transition initiation factors like eIF4E, and eIF4G plays significant roles against virus infection and are involved in resistance against potyviruses, maize rough dwarf disease, tungro spherical virus, and potato virus Y	Lee et al. 2010, Duan et al. 2012, Wang and Krishnaswamy 2012	3.45-3.02
								TraesCS1B02G349200	Regulation of transcription, positive regulation of long-day photoperiodism, flowering	Chromosome 1B: 579,782,295-579,788,006 forward strand.	TaNAC35 transcription factor, plays an important role in the negative regulation of leaf rust resistance against Puccinia triticina. Puccinia striiformis is another fungal pathogen.	Iqbal et al (2022)
								TraesCS1B02G349300	hydrolase activity, tRNA binding, nucleotide binding, translation initiation factor activity, GTPase activity,	Chromosome 1B: 579,788,398-579,793,281 reverse strand.	Different hydrolase families act as pathogen associated molecular patterns which trigger plant immune responses	Rafiei et al., 2021
	4	Q.STB.1D.1	3064683	44775232	0.00146 to 0.00049	0.11093 to 0.11724	STB19 and STBm	TraesCS1D02G064200	ADP binding	Chromosome 1D: 44,648,152-44,651,988 reverse strand.	-	-	3.31-3.00
								TraesCS1D02G064000	Zinc ion binding	Chromosome 1D: 44,641,171-44,642,987 reverse strand.	RAR1, a zinc binding protein of wheat, confers resistance against the stripe rust pathogen through salicylic acid (SA)-mediated oxidative burst and hypersensitive response	Wang et al., 2017
	5	Q.STB_DH.2A.1	3955868	106815147	2.07E-07 to 8.76E-04	0.06042-0.14214	STB19, STB20 and STBm	TraesCS2A02G159300	4-alpha-glucanotransferase, Glycoside hydrolase superfamily	Chromosome 2A: 10,568,358-10,572,443 reverse strand	TaGSL22 aglucan synthase-like (GSL) orthologs induces a higher resistance to powdery mildew in wheat.	Cheng et al (2021)	6.68-3.06
					to	to
					0.000876	0.14214
	6	Q.STB.2A.3	1091069	528700315	6.45E-05 to 8.10E-05	0.08697 to 0.0898	STB19, STB20 and STBm	TraesCS2A02G307700	Metal ion binding	Chromosome 2A: 528,658,621-528,663,722 reverse strand.	Metal ions affect bacterial plant disease	Fones and Preston, 2013	4.19-4.09
								TraesCS2A02G307700	Metal ion binding	Chromosome 2A: 528,658,621-528,663,722 reverse strand.	-	-
	7	Q.STB.2A.6	1060943	763087785	0.000352 to 9.92E-04	0.07873 to 0.09192	STB19 and STBm	TraesCS2A02G561400	Zinc ion binding,sequence-specific DNA binding	Chromosome 2A: 763,050,709-763,053,402 forward strand.	Zinc role in plant defense against pathogens and herbivores	Cabot et al.,2019	3.45-3.00
								TraesCS2A02G561300	Transcription factor activity, zinc ion binding, sequence-specific DNA binding	Chromosome 2A: 763,044,792-763,047,797 forward strand.	Trancription factor, TaNAC069 gene plays a positive regulatory role in wheat to leaf rust fungi	Zhang et al (2021)
	8	Q.STB.2A.7	1101257	764311151	0.00109 to 0.000283	0.07464 to 0.09122	STB19 and STBm	TraesCS2A02G563900	Serine/threonine kinase activity, protein kinase activity, protein, protein binding, ATP binding	Chromosome 2A: 764,308,981-764,312,225 forward strand.	Serine/threonine kinase gene Stpk-V, a key member of powdery mildew resistance gene Pm21, confers powdery mildew resistance in wheat	Cao et al (2011)	3.55-3.00
								TraesCS2A02G563700	Carbohydrate binding	Chromosome 2A: 764,217,505-764,219,279 reverse strand.	-	-
	9	Q.STB.2B.4	3026452	812292519	0.00108 to 0.000000655	0.07663 to 0.17215	STB19, STB21 and STBm	TraesCS2B02G630000	Protein kinase activity, ATP binding, protein phosphorylation	Chromosome 2B: 801,162,070-801,163,970 forward strand.	-	-	6.18-3.00
								TraesCS2B02G630100	Protein binding, protein ubiquitination	Chromosome 2B: 801,216,576-801,224,385 reverse strand.	Protein ubiquitination plays a key role in the modulation of plant immunity	Furlan et al., 2012
								TraesCS2B02G629800	ADP binding	Chromosome 2B: 800,855,678-800,866,082 forward strand.
	10	Q.STB_DH.3B.2	1059080	680375512	0.000397 to 0.000793	0.0631 to 0.07068	STB19 and STB21	TraesCS3B02G440800		Chromosome 3B: 680,419,785-680,424,974 forward strand.	Significant responses to powdery mildew and stripe rust resistance in wheat	Tang et al (2023)	3.40-3.10
								TraesCS3B02G440700	Protein kinase activity, protein tyrosine kinase activity, transmembrane receptor protein tyrosine kinase activity, ATP binding	Chromosome 3B: 680,331,336-680,335,556 reverse strand.	Wheat protein kinase 1, SnRK1αs play a role in the Fusarium toxin response and tolerance	Perochon et al., 2019
	11	Q.STB.3B.1	1037234	681714448	0.000598 to 0.0000782	0.06694 to 0.08853	STB19 and STB21	TraesCS3B02G442303	Zinc ion binding, transferase activity, metal ion binding	Chromosome 3B: 681,568,413-681,570,632 reverse strand.	Zn had a positive effect on the tolerance of wheat to F. solani root rot	Tadayon et al., 2022	4.11-3.22
								TraesCS3B02G442400	Cysteine-kinase, deubiquitinase activity, ubiquitin-dependent protein catabolic process, protein deubiquitination	Chromosome 3B: 681,951,967-681,956,788 forward strand.	A wheat cysteine-rich receptor-like kinase confers broad-spectrum resistance against Septoria tritici blotch	Saintenac et al (2021)
								TraesCS3B02G442600	Protein coding	Chromosome 3B: 682,120,362-682,122,690 reverse strand.
								TraesCS3B02G442100	Catalytic activity, aldose 1-epimerase activity, isomerase activity, carbohydrate binding, carbohydrate metabolic process, glucose metabolic process, hexose metabolic process, galactose catabolic process via UDP-galactose	Chromosome 3B: 681,210,390-681,211,928 forward strand.	Induce cell death in Nicotiana benthamiana in reaction to Phytophthora sojae	Xu et al 2021
	12	Q.STB.4B.1	1092528	22704276	0.00143 to 0.00149	0.06384 to 0.06498	STB 21 and STBm	TraesCS4B02G030300	DNA binding	Chromosome 4B: 22,564,475-22,575,232 reverse strand.			4.68-3.26
	13	Q.STB.5A.1	995502	36538241	0.0000209 to 0.000551	0.07149 to 0.10462	STB19, STB20, STB21 and STBm	TraesCS5A02G040600	Protein binding	Chromosome 5A: 36,493,425-36,496,347 reverse strand.	-	-
								TraesCS5A02G040500	Protein coding	Chromosome 5A: 36,482,280-36,485,021 reverse strand.
	14	Q.STB.5A.2	1228444	37896699	3.32E-04 to 0.0000691	0.07483 to 0.09046	STB20 and STBm	TraesCS5A02G042200	Protein coding	Chromosome 5A: 37,974,793-37,981,428 reverse strand.			4.16-3.48
	15	Q.STB.5A.5	1023146	417225903	2.21E-04 to 3.95E-05	0.15921 to 0.20859	STB21 and STBm	TraesCS5A02G206700	Protein kinase activity, ATP binding	Chromosome 5A: 417,252,341-417,257,021 forward strand.	Inactivation of a wheat protein kinase gene TaPsIPK1 confers broad-spectrum resistance to rust fungi	Wang et al 2022	4.40-3.66
	16	Q.STB.5B.1	1122319	49925060	0.00111 to 5.07E0.5	0.06974 to 0.11234	STB19, STM20, STN21 and STBm	TraesCS5B02G044500	Protein coding	Chromosome 5B: 49,884,821-49,890,254 reverse strand.	-	-	4.63-3.00
	17	Q.STB.5B.3	3222429	244491166	0.000176 to 7.75E-05	0.07687 to 0.10041	STB19, STM20, STN21 and STBm	TraesCS5B02G131500	Protein coding	Chromosome 5B: 244,411,412-244,414,663 forward strand.	-	-	4.11-3.19
	18	Q.STB.6A.1	2258509	600737360	0.00015 to 0.00000698	0.09489 to 0.14017	STB19, STB21 and STBm	TraesCS6A02G380300	Metal ion binding	Chromosome 6A: 600,693,386-600,698,415 forward strand.	Metal ions affect bacterial plant disease	Fones and Preston, 2013	5.16-3.61
								TraesCS6A02G380200	Chromatin binding, methyltransferase activity	Chromosome 6A: 600,670,797-600,676,639 forward strand.	Fusarium head blight Type II disease resistance and grain development in wheat	Pandelova et al (2009)
								TraesCS6A02G380500	Protein binding	Chromosome 6A: 600,815,627-600,818,007 forward strand.	-	-
	19	Q.STB.6A.3	1089240	614688143	0.00103 to 0.000314	0.06105 to 0.07382	STB21 and STBm	TraesCS6A02G41400	ADP binding	Chromosome 6A: 614,673,412-614,678,395 reverse strand.	NADPH oxidases enzyme responsible for ROS accumulation in the response to pathogen infection	Apel & Hirt, 2004)	3.50-3.00
								TraesCS6A02G414200	ADP binding	Chromosome 6A: 614,691,169-614,697,825 reverse strand.
								TraesCS6A02G413700	Lipid binding	Chromosome 6A: 614,645,391-614,650,712 reverse strand.	Defence against pathogens	Ben et al., 2021
	20	Q.STB.7B.2	1228174	68307597	0.00102 to 0.00038	0.06196 to 0.07229	STB19 and STBm	TraesCS7B02G063400	Sucrose synthase activity, transferase activity, glycosyltransferase activity	Chromosome 7B: 68,344,037-68,349,270 reverse strand.	control the source-sink relationship for biomass and grain yield in rice	Mathan et al (2021)	3.42-3.00
								TraesCS7B02G063500	Phosphatase activity, phosphoric ester hydrolase activity, phosphatidylinositol-3,5-bisphosphate 5-phosphatase activity	Chromosome 7B: 68,535,940-68,545,735 reverse strand.	Protein phosphatase, PP2A contributes to plant resistance against necrotrophic fungal pathogens in wheat	Durian et al (2020)
								TraesCS7B02G063500	Phosphatase activity, phosphoric ester hydrolase activity, phosphatidylinositol-3,5-bisphosphate 5-phosphatase activity	Chromosome 7B: 68,535,940-68,545,735 reverse strand.	-	-
	21	Q.STB.7D.5	2273491	556224991	0.000414	0.09115	STB19 and STBm	TraesCS7D02G437000	Lipid binding	Chromosome 7D: 556,309,722-556,320,433 reverse strand.	Defence against pathogens	Ben et al., 2022	3.38-3.18
								TraesCS7D02G436800	DNA binding, protein binding	Chromosome 7D: 556,120,190-556,124,226 forward strand.	DNA-binding IDs likely function as signaling domains that help NLRs initiate defense responses	Andersen et al., 2020
	Pleiotropic QTS between STB and DH found in one year
		Q.STB_DH.5A.3	5411867	588454993	0.00067514	0.06702	STB19	TraesCS5A02G392300	Transmembrane transporter and ATPase activity	Chromosome 5A: 588,548,725-588,552,987 forward strand.			3.17
		Q.STB_DH.5D.4	1218077	545847641	0.00142	0.06897	STB19	TraesCS5D02G622000LC	Protein coding	Chromosome 5D: 545,889,079-545,889,936 forward strand.			2.85
		Q.STB_DH.UN.5	1096246		0.00125	0.09136	STB21						2.9
	*Bold and red one are pleiotropic MTAs between STB and days to heading
	*Bold and black are stable QTSs
	References
	M. Yu, Z. Zhou, X. Liu, D. Yin, D. Li, X. Zhao, X. Li, S. Li, R. Chen, L. Lu, D. Yang, D. Tang, L. Zhu
	The OsSPK1-OsRac1-RAI1 defense signaling pathway is shared by two distantly related NLR proteins in rice blast resistance Plant Physiol., 187 (2021), pp. 2852-2864
	WEIGUO HU1,3, QIAOHUI WANG1, SIWEN WANG1, MENGMENG WANG1, CHANGYOU WANG1,2, ZENGRONG TIAN1, XINLUN LIU1, WANQUAN JI1,2* and HONG ZHANG1. 2020. Gene co-expression network analysis provides a novel insight into the dynamic response of wheat to powdery mildew stress. Journal of Genetics (2020) 99:44
	Pilar Corredor-Moreno, Francesca Minter, Phoebe E Davey, Eva Wegel, Baldeep Kular, Paul Brett, Clare M Lewis, Yvie M L Morgan, Luis A Macías Pérez, Andrey V Korolev, Lionel Hill, Diane G O Saunders, The branched-chain amino acid aminotransferase TaBCAT1 modulates amino acid metabolism and positively regulates wheat rust susceptibility, The Plant Cell, Volume 33, Issue 5, May 2021, Pages 1728–1747,
	Breen S, Williams SJ, Winterberg B, Kobe B, Solomon PS. Wheat PR-1 proteins are targeted by necrotrophic pathogen effector proteins. Plant J. 2016 Oct;88(1):13-25. doi: 10.1111/tpj.13228. Epub 2016 Aug 10. PMID: 27258471.
	Murphy, A. M., Otto, B., Brearley, C. A., Carr, J. P., and Hanke, D. E. (2008). A role for inositol hexakisphosphate in the maintenance of basal resistance to plant pathogens. Plant J. 56, 638–652. doi: 10.1111/j.1365-313X.2008.03629.x
	Papadopoulou, K., Melton, R., Leggett, M., Daniels, M.J., and Osbourn, A.E. (1999). Compromised disease resistance in saponin-deficient plants. Proc. Natl. Acad. Sci. USA 96 : 12923–12928.
	Tang Y, Yang X, Li H, Shuai Y, Chen W, Ma D and Lü Z (2023) Uncovering the role of wheat magnesium transporter family genes in abiotic responses. Front. Plant Sci. 14:1078299. doi: 10.3389/fpls.2023.1078299
	Saintenac C, Cambon F, Aouini L, Verstappen E, Ghaffary SMT, Poucet T, Marande W, Berges H, Xu S, Jaouannet M, Favery B, Alassimone J, Sánchez-Vallet A, Faris J, Kema G, Robert O, Langin T. A wheat cysteine-rich receptor-like kinase confers broad-spectrum resistance against Septoria tritici blotch. Nat Commun. 2021 Jan 19;12(1):433
	Yuanpeng Xu, Yunhuan Zhang, Jinyin Zhu, Yujing Sun, Baodian Guo, Fan Liu, Jie Huang, Haonan Wang, Suomeng Dong, Yan Wang, Yuanchao Wang, Phytophthora sojae apoplastic effector AEP1 mediates sugar uptake by mutarotation of extracellular aldose and is recognized as a MAMP, Plant Physiology, Volume 187, Issue 1, September 2021, Pages 321–335
	Iovanna Pandelova, Melania F. Betts, Viola A. Manning, Larry J. Wilhelm, Todd C. Mockler and Lynda M. Ciuffetti (2009) Analysis of Transcriptome Changes Induced by Ptr ToxA in Wheat Provides Insights into the Mechanisms of Plant Susceptibility. Molecular Plant • Volume 2 • Number 5 • Pages 1067–1083
	Apel K, Hirt H, 2004. Reactive oxygen species: metabolism, oxidative stress, and signal transduction. Annual Review of Plant Biology 55, 373–99.
	Helen Fones, Gail M. Preston, The impact of transition metals on bacterial plant disease, FEMS Microbiology Reviews, Volume 37, Issue 4, July 2013, Pages 495–519, https://doi.org/10.1111/1574-6976.12004
	Cheng P, Wang Z, Ren Y, Jin P, Ma K, Li Q and Wang B (2021) Silencing of a Wheat Ortholog of Glucan Synthase-Like Gene Reduced Resistance to Blumeria graminis f. sp. tritici. Front. Plant Sci. 12:800077. doi: 10.3389/fpls.2021.800077
	Lee, J.H., Muhsin, M., Atienza, G.A., Kwak, D.Y., Kim, S.M., De, Leon, T.B., Angeles, E.R., Coloquio, E., Kondoh, H., Satoh, K., Cabunagan, R.C., Cabauatan, P.Q., Kikuchi, S., Leung, H., Choi, I.R.: Single nucleotide polymorphisms in a gene for translation initiation factor (eIF4G) of rice (Oryza sativa) associated with resistance to Rice tungro spherical virus. - Mol. Plant Microbe Interact. 23:…
	Duan, H., Richael, C., Rommens, C.M.: Overexpression of the wild potato eIF4E-1 variant Eva1 elicits Potato virus Y resistance in plants silenced for native eIF4E-1. - Transgenic Res. 21: 929-938, 2012.
	Duan, H., Richael, C., Rommens, C.M.: Overexpression of the wild potato eIF4E-1 variant Eva1 elicits Potato virus Y resistance in plants silenced for native eIF4E-1. - Transgenic Res. 21: 929-938, 2012.
	Wang N, Tang C, Fan X, He M, Gan P, Zhang S, Hu Z, Wang X, Yan T, Shu W, Yu L, Zhao J, He J, Li L, Wang J, Huang X, Huang L, Zhou JM, Kang Z, Wang X. Inactivation of a wheat protein kinase gene confers broad-spectrum resistance to rust fungi. Cell. 2022 Aug 4;185(16):2961-2974.
	Ben, H.A., Ben, S.R., Dhifi, W., Mnif, W. & Brini, F. (2021) Novel non-specific lipid-transfer protein (TdLTP4) isolated from durum wheat: antimicrobial activities and anti-inflammatory properties in lipopolysaccharide (LPS)-stimulated RAW 264.7 macrophages. Microbial Pathogenesis, 154, 104869.
	Wang, X., Wang, Y., Liu, P., Ding, Y., Mu, X., Liu, X., et al. (2017). TaRar1 is involved in wheat defense against stripe rust pathogen mediated by YrSu. Front. Plant Sci. 8, 156. doi: 10.3389/fpls.2017.00156
	Cabot C, Martos S, Llugany M, Gallego B, Tolrà R and Poschenrieder C (2019) A Role for Zinc in Plant Defense Against Pathogens and Herbivores. Front. Plant Sci. 10:1171.
	Mohammad Saeed Tadayon, Sohrab Sadeghi. (2022) Relationships between the incidence of fire blight in apple orchards and plant nutritional imbalance indices. The Journal of Horticultural Science and Biotechnology 0:0, pages 1-14.
	Mathan J, Singh A, Ranjan A. Sucrose transport and metabolism control carbon partitioning between stem and grain in rice. J Exp Bot. 2021 May 28;72(12):4355-4372. doi: 10.1093/jxb/erab066. PMID: 33587747.
	Guido Durian, Verena Jeschke, Moona Rahikainen, Katariina Vuorinen, Peter J. Gollan, Mikael Brosché, Jarkko Salojärvi, Erich Glawischnig, Zsófia Winter, Shengchun Li, Graham Noctor, Eva-Mari Aro, Jaakko Kangasjärvi, Kirk Overmyer, Meike Burow, Saijaliisa Kangasjärvi, PROTEIN PHOSPHATASE 2A-B′γ Controls Botrytis cinerea Resistance and Developmental Leaf Senescence , Plant Physiology, Volume 182, I…
	Alexandre Perochon, Zsolt Váry, Keshav B. Malla, Nigel G. Halford, Matthew J. Paul, Fiona M. Doohan. 2019The wheat SnRK1α family and its contribution to Fusarium toxin tolerance. Plant Science. Volume 288, 110217.
	Andersen EJ, Nepal MP, Purintun JM, Nelson D, Mermigka G and Sarris PF (2020) Wheat Disease Resistance Genes and Their Diversification Through Integrated Domain Fusions. Front. Genet. 11:898. doi: 10.3389/fgene.2020.00898
	Zhang Y, Geng H, Cui Z, Wang H and Liu D (2021) Functional Analysis of Wheat NAC Transcription Factor, TaNAC069, in Regulating Resistance of Wheat to Leaf Rust Fungus. Front. Plant Sci. 12:604797.
	Iqbal A, Bocian J, Hameed A, Orczyk W, Nadolska-Orczyk A. Cis-Regulation by NACs: A Promising Frontier in Wheat Crop Improvement. International Journal of Molecular Sciences. 2022; 23(23):15431.
	Rafiei, V.; Vélëz, H.; Tzelepis, G. The Role of Glycoside Hydrolases in Phytopathogenic Fungi and Oomycetes Virulence. Int. J. Mol. Sci. 2021, 22, 9359.
	Cao A, Xing L, Wang X, Yang X, Wang W, Sun Y, Qian C, Ni J, Chen Y, Liu D, Wang X, Chen P. Serine/threonine kinase gene Stpk-V, a key member of powdery mildew resistance gene Pm21, confers powdery mildew resistance in wheat. Proc Natl Acad Sci U S A. 2011 May 10;108(19):7727-32.
	Furlan G, Klinkenberg J and Trujillo M (2012) Regulation of plant immune receptors by ubiquitination. Front. Plant Sci. 3:238. doi: 10.3389/fpls.2012.00238

## Sheet: S7
	Table S7: The unique quantitative trait SNPs (QTNs) controlling the Septoria tritici blotch and the putative candidate genes covering the flanking region of repetitive resistance QTNs
	Year	Marker	QTSs	Pos	MarkerR2	Genetic Var	Residual Var	-log10pvalue	Gene ID	Gene Ontology (Biological/Molecular process)	Chromosme Location
	STB21	5355343	Q.STB.1A.2	555693545	0.12307	11587.3	11695.6	5.51676	TraesCS1A02G386500	Acetylglucosaminyltransferase activity, glycosyltransferase activity	Chromosome 1A: 555,652,920-555,658,642 forward strand.
	STB19	3034508	Q.STB.1A.3	582959772	0.11532	6932.35	57672.6	3.29055	TraesCS1A02G430400	H3K4-specific demethylase, JmjC domain-containing protein, Control of stem elongation, Control of transposon activity, Panicle developmen [Source: Projected from Oryza sativa (Os05g0196500)]	Chromosome 1A: 582,864,940-582,872,617 reverse strand.
									TraesCS1A02G430500	Protein activity	Chromosome 1A: 583,114,544-583,117,076 forward strand.
	STB21	3385482	Q.STB.1B.1	570759883	0.13075	11879.2	13889	3.93204	TraesCS1B02G342500	Ethylene-activated signaling pathway, ethylene-activated signaling pathway	Chromosome 1B: 570,525,909-570,526,718 forward strand.
									TraesCS1B02G342200	Proline-tRNA ligase activity, proline-tRNA ligase activity	Chromosome 1B: 570,291,916-570,303,585 reverse strand.
	STB21	1026699	Q.STB.2A.1	11695202	0.07682	15869.7	10238.8	2.99568	TraesCS2A02G024200	Protein kinase activity, ATP binding, protein phosphorylation	Chromosome 2A: 11,743,379-11,773,973 forward strand.
	STB19	1231823	Q.STB.2A.2	147865042	0.06323	27336.9	27471.6	2.93554	TraesCS2A02G186300	Response to auxin	Chromosome 2A: 148,024,006-148,024,648 forward strand.
	STB21	989588	Q.STB.2A.4	666154770	0.22718	1912.9	19879	5.79942	TraesCS2A02G408800	Protein binding	Chromosome 2A: 666,027,213-666,031,416 reverse strand.
	STB21	1205938	Q.STB.2A.5	737628168	0.06145	20064	6123.68	2.82974	TraesCS2A02G512600	DNA topoisomerase type II (double strand cut, ATP-hydrolyzing) activity, DNA binding, ATP binding	Chromosome 2A: 737,641,620-737,643,502 forward strand.
	STB20	7865016	Q.STB.2A.8	776999671	0.06827	24004.5	3519.78	2.91364	TraesCS2A02G586500	Protein coding	Chromosome 2A: 777,069,651-777,071,193 reverse strand.
	STB21	1862723	Q.STB.2A.9	779028972	0.11634	13988.1	9867.91	5.3553	TraesCS2A02G591300	Protein binding, negative regulation of ethylene-activated signaling pathway	Chromosome 2A: 778,918,761-778,924,088 reverse strand.
	STB21	12009940	Q.STB.2B.1	11710780	0.12934	9027.53	10226.2	3.25202	TraesCS2B02G025500	Protein kinase activity, protein phosphorylatio	Chromosome 2B: 11,659,503-11,668,668 reverse strand.
	STB21	3028021	Q.STB.2B.2	453665747	0.10748	14700.2	10291	4.80807	TraesCS2B02G318000	Ubiquitin-dependent protein catabolic process, protein deubiquitination	Chromosome 2B: 453,809,195-453,813,696 forward strand.
	STB21	1024643	Q.STB.2B.3	471533746	0.1134	13644.9	10915.7	5.11754	TraesCS2B02G328900	Calmodulin binding,	Chromosome 2B: 471,441,139-471,446,750 reverse strand.
	STB21	1725789	Q.STB.3A.1	716807570	0.07838	8495.33	15648.1	3.10431	TraesCS3A02G489000	Systemic acquired resistance, salicylic acid mediated, regulation of jasmonic acid mediated signaling pathway, protein binding signaling pathway	Chromosome 3A: 716,756,231-716,759,651 forward strand.
									TraesCS3A02G489100	Plasma membrane	Chromosome 3A: 716,777,338-716,778,424 forward strand.
	STB21	1076556	Q.STB.3B.2	682688048	0.09397	5729.66	19936	3.19354	TraesCS3B02G442700	Xylan biosynthetic process, glycosyltransferase activity,	Chromosome 3B: 682,785,954-682,791,967 reverse strand.
	STB21	1092165	Q.STB.3B.3	844294396	0.15123	6054.6	16413.3	5.00483	TraesCS3B02G612900	Protein dimerization activity, regulation of DNA-templated transcription	Chromosome 3B: 830,610,808-830,611,874 forward strand.
	STB21	2251455	Q.STB.3D.1	51815343	0.11114	15403.7	7050.24	2.97062	TraesCS3D02G100200	DNA binding	Chromosome 3D: 51,786,926-51,789,997 reverse strand.
	STB21	1022931	Q.STB.3D.2	468241526	0.11565	13168.6	11273.8	5.32196	-	-	-
	STB21	5411528	Q.STB.3D.3	562308599	0.11848	14733.4	10532.8	5.1757	TraesCS3D02G456200	Protein binding	Chromosome 3D: 562,348,087-562,350,195 forward strand.
	STB21	1024214	Q.STB.3D.4	585088524	0.11379	13409.5	10886.4	5.19192	TraesCS3D02G491400	Pentose-phosphate shunt, phosphogluconate dehydrogenase (decarboxylating) activity	Chromosome 3D: 585,084,630-585,086,355 forward strand.
									TraesCS3D02G491500	Defense response	Chromosome 3D: 585,096,328-585,105,676 reverse strand.
	STB21	3222371	Q.STB.3D.5	602416939	0.13047	10046.8	11453.1	3.83316	TraesCS3D02G520000	Protein coding	Chromosome 3D: 602,455,009-602,458,105 reverse strand.
	STB21	1091463	Q.STB.4A.1	321068650	0.12084	14227.4	9444.48	5.21035	TraesCS4A02G157500	Cysteine-type peptidase activity, proteolysis	Chromosome 4A: 321,185,770-321,195,641 forward strand.
	STB21	1108063	Q.STB.4A.2	621300773	0.13498	10972.4	12914.1	3.98607	TraesCS4A02G340300	Protein coding	Chromosome 4A: 621,506,611-621,509,442 forward strand.
	STB21	1092528	Q.STB.4B.1	22704276	0.06498	17801.9	10000.4	2.84466	TraesCS4B02G030700	protein binding	Chromosome 4B: 22,893,713-22,898,268 reverse strand.
	STB21	3952105	Q.STB.4B.2	196765984	0.09934	12264	13657.3	3.71801	-	-	-
	STB21	1075213	Q.STB.4B.3	459129205	0.11428	11405.6	14223.5	4.84527	TraesCS4B02G217700	GTPase activity	Chromosome 4B: 459,073,746-459,075,725 reverse strand.
	STB20	989815	Q.STB.5A.3	38613021	0.06428	22133.5	3577.84	3.12041	TraesCS5A02G042500	Integral component of membrane	Chromosome 5A: 38,710,850-38,714,632 forward strand.
	STB21	7354082	Q.STB.5A.4	125662272	0.07591	15393.4	11262.7	3.20754	TraesCS5A02G091300	Protein coding	Chromosome 5A: 126,099,708-126,101,210 reverse strand.
	STB19	5411867	Q.STB_DH.5A.3	588454993	0.06702	21029.4	34526.2	3.17061	TraesCS5A02G392300	Transmembrane transport, mitochondrion,	Chromosome 5A: 588,548,725-588,552,987 forward strand.
	STB19	1106357	Q.STB.5A.6	590251199	0.07304	22600.3	36939.6	2.95468	TraesCS5A02G394600	Protein coding	Chromosome 5A: 590,294,028-590,295,164 reverse strand.
	STB21	1023448	Q.STB.5A.7	632866685	0.12958	13617.2	8996.88	3.52953	TraesCS5A02G451000	Protein binding	Chromosome 5A: 632,873,707-632,875,336 forward strand.
	STB21	3956846	Q.STB.5A.8	690569043	0.10752	17120.6	7445.45	2.93181	TraesCS5A02G533300	Regulation of transcription by RNA polymerase II, DNA-binding transcription factor activity	Chromosome 5A: 690,560,889-690,566,818 forward strand.
	STB19	5577028	Q.STB.5B.2	79082406	0.09266	23108.6	32627.4	3.15446	TraesCS5B02G069200	Protein phosphorylation, protein kinase activity	Chromosome 5B: 78,961,249-78,967,066 forward strand.
	STB19	992847	Q.STB.5B.4	459683061	0.10963	10966.4	62015.5	2.84164	TraesCS5B02G274000	Helicase activity	Chromosome 5B: 459,476,178-459,493,013 reverse strand.
	STB21	1019948	Q.STB.5D.1	382058033	0.12811	17976.8	8100.89	3.40753	TraesCS5D02G280600	Ubiquitin-protein transferase activator activity, anaphase-promoting complex binding, protein binding	Chromosome 5D: 381,978,841-381,981,151 forward strand.
	STB19	1218077	Q.STB_DH.5D.4	545847641	0.06897	23445.1	33151.3	2.84771	TraesCS5D02G529000	Aspartic-type endopeptidase activity,	Chromosome 5D: 545,921,587-545,923,207 forward strand.
									TraesCS5D02G529100	Guanyl-nucleotide exchange factor activity, vesicle-mediated transport	Chromosome 5D: 545,926,550-545,933,137 forward strand.
	STB21	1273651	Q.STB.5D.2	553570683	0.10822	14018.3	10859.7	4.84421	TraesCS5D02G543200	Protein binding	Chromosome 5D: 553,625,548-553,627,025 reverse strand.
									TraesCS5D02G543300	O-acyltransferase activity, lipid metabolic process	Chromosome 5D: 553,654,500-553,656,255 forward strand.
	STB21	1863926	Q.STB.6A.2	607033164	0.06391	19070.8	7457.31	3.01808	TraesCS6A02G392500	Translation, structural constituent of ribosome,	Chromosome 6A: 606,975,143-606,980,024 forward strand.
	STB21	3025570	Q.STB.6B.1	599648378	0.10745	16690.4	7397.99	4.46376	TraesCS6B02G340300	Metalloendopeptidase activity, proteolysis, extracellular matrix	Chromosome 6B: 599,685,380-599,686,950 forward strand.
									TraesCS6B02G340700	Transmembrane transport, solute:proton antiporter activity, integral component of membrane	Chromosome 6B: 599,755,819-599,759,186 forward strand.
	STB21	1025472	Q.STB.6D.1	9855559	0.10791	15512.3	8781.29	4.36361	TraesCS6D02G025700	Protein phosphorylation, protein kinase activity, ATP binding	Chromosome 6D: 9,870,240-9,880,090 forward strand.
									TraesCS6D02G025800	Acyltransferase activity, transferring groups other than amino-acyl groups	Chromosome 6D: 9,906,332-9,908,095 reverse strand.
	STB21	1210314	Q.STB.6D.2	105735432	0.11117	10689.9	12479	4.56527	TraesCS6D02G137100	Cysteine-type deubiquitinase activity, shoot system morphogenesis, ubiquitin-dependent protein catabolic process	Chromosome 6D: 105,816,962-105,819,828 forward strand
									TraesCS6D02G137200	Protein dephosphorylation, protein serine/threonine phosphatase activity, cation binding	Chromosome 6D: 105,819,999-105,825,261 reverse strand.
	STB20	2282774	Q.STB.7A.1	20375244	0.11482	21025.1	4998.64	3.49243	TraesCS7A02G044100	Defense response, ADP binding	Chromosome 7A: 20,435,962-20,446,626 forward strand.
									Chromosome 7A: 20,457,921-20,460,497 forward strand.	Defense response, ADP binding	Chromosome 7A: 20,457,921-20,460,497 forward strand.
									TraesCS7A02G044300	Defense response	Chromosome 7A: 20,482,829-20,486,172 forward strand.
	STB21	3954175	Q.STB.7A.2	82358398	0.0918	14797.4	8886.13	3.24445	TraesCS7A02G128600	Histone-lysine N-methyltransferase activity, protein binding, chromatin remodeling, PcG protein complex	Chromosome 7A: 82,506,261-82,516,939 reverse strand.
									TraesCS7A02G128400	ATP hydrolysis activity	Chromosome 7A: 82,218,276-82,226,625 reverse strand.
	STB21	3222181	Q.STB.7A.3	705651886	0.16366	22478.8	2012.13	3.81924	TraesCS7A02G523000	Protein phosphorylation, protein kinase activity, integral component of membrane	Chromosome 7A: 705,687,623-705,691,124 reverse strand.
									TraesCS7A02G522800	Oxidoreductase activity, acting on paired donors, with incorporation or reduction of molecular oxygen, monooxygenase activity, iron ion binding	Chromosome 7A: 705,678,247-705,679,996 forward strand.
	STB20	1109521	Q.STB.7B.1	26496726	0.11524	21136	3415.11	3.0919	TraesCS7B02G027800	Protein ubiquitination, protein binding	Chromosome 7B: 26,644,710-26,646,247 forward strand.
	STB21	993049	Q.STB.7B.3	254295433	0.10059	14265.6	11144.5	4.38037	TraesCS7B02G177500	Ttranscription coregulator activity, chromatin DNA binding	Chromosome 7B: 253,691,830-253,707,894 reverse strand.
	STB19	1137091	Q.STB.7B.4	542308851	0.08723	15457.6	31273.6	2.90309	-	-	-
	STB21	5412082	Q.STB.7D.1	94834780	0.12198	12211.3	14625.9	2.90658	TraesCS7D02G148000	Cytokinin-activated signaling pathway, phosphorelay signal transduction system	Chromosome 7D: 94,936,389-94,940,380 forward strand.
									TraesCS7D02G148100	Phosphorelay signal transduction system, signal transduction, ransferase activity, transferring phosphorus-containing groups, phosphorelay sensor kinase activity, integral component of membrane	Chromosome 7D: 95,053,348-95,060,604 forward strand.
	STB21	1024820	Q.STB.7D.2	182602328	0.10325	12002.1	11140.6	4.58423	TraesCS7D02G221600	Protein phosphatase regulator activity,	Chromosome 7D: 182,602,319-182,606,717 forward strand.
									TraesCS7D02G221700	Protein binding, deadenylation-independent decapping of nuclear-transcribed mRNA	Chromosome 7D: 182,802,743-182,811,919 forward strand.
	STB21	988771	Q.STB.7D.3	256484812	0.0865	15396	9550.54	3.87995	TraesCS7D02G270600	Regulation of DNA-templated transcription, DNA-binding transcription factor activity	Chromosome 7D: 256,442,952-256,444,816 reverse strand.
	STB21	2265463	Q.STB.7D.4	426732623	0.1108	14084.4	7499.5	3.29767	TraesCS7D02G334800	rRNA processing	Chromosome 7D: 426,729,666-426,735,353 forward strand.

## Sheet: S8
	Table S8: Significant Haplotype contributing Septoria tritici blotch resistance
		Alleles	G/C	G/A	A/G	T/C	G/A	C/T	A/G		T/C	G/A	T/C	T/G	A/G	C/A	G/A
		Chrom	2A	2B	3B	5A	5B	5B	6A		1A	1B	1B	2A	6A	7B	7D
		Position	528700315	812292519	680375512	36538241	49925060	244491166	600737360		370228607	572985684	579824305	763087785	614688143	68307597	556224991
		QTSs	Q.STB.2A.3	Q.STB.2B.4	Q.STB_DH.3B.2	Q.STB.5A.1	Q.STB.5B.1	Q.STB.5B.3	Q.STB.6A.1		Q.STB.1A.1	Q.STB.1B.2	Q.STB.1B3	Q.STB.2A.6	Q.STB.6A.3	Q.STB.7B.2	Q.STB.7D.5
	S. No	rs#	1091069|F|0-29:G>A-29:G>A	3026452|F|0-19:G>A-19:G>A	1059080|F|0-8:A>G-8:A>G	995502|F|0-8:C>T-8:C>T	1122319|F|0-59:G>A-59:G>A	3222429|F|0-29:C>T-29:C>T	2258509|F|0-58:A>G-58:A>G	STBm	997942|F|0-41:C>T-41:C>T	1093490|F|0-28:G>A-28:G>A	1090302|F|0-63:T>C-63:T>C	1060943|F|0-64:G>T-64:G>T	1089240|F|0-11:A>G-11:A>G	1228174|F|0-36:C>A-36:C>A	2273491|F|0-41:G>A-41:G>A	No of Resistant allele	Total haplotypes	Frequency of Resistant haplotype
	75	IND80	S	S	S	S	R	S	S	1140.23	S		S	S	S	S	S	1	14	7.14286
	57	IND60	S	S	S	S	R		S	1198.15		S	S	S	S	S	S	1	14	7.14286
	146	BGD59	S		R	S				1144.86	S	S	S	S	S	S	S	1	14	7.14286
	132	BGD45	S		R	S		S		948.457		S	S	S	S	S	S	1	14	7.14286
	51	IND54	S	S	R	S		S		1186.93	S	S		S	S	S	S	1	14	7.14286
	112	BGD25	S	S	R	S		S	S	1012.65	S	S		S	S	S	S	1	14	7.14286
	58	IND61	S		S	S		S	S	1218.31	S	S	R	S		S	S	1	14	7.14286
	170	BGD83	S	S	R	S		S		991.975	S	S	S	S	S	S		1	14	7.14286
	48	IND51	S	S	S	S	R	S		1384.84			S	S	S	S	S	1	14	7.14286
	60	IND63	S		R	S	S	S	S	1124.07	R	S	S	S	S	S	S	2	14	14.2857
	88	IND94	S	S	S	S	R		S	1164.92	R	S	S	S	S	S	S	2	14	14.2857
	92	BGD4	S	R	S	S	R	S		933.128	S	S	S	S	S	S	S	2	14	14.2857
	95	BGD7	S	S	R	S	R	S		1082	S	S	S	S	S	S	S	2	14	14.2857
	119	BGD32	S	S	R	S	R			999.897	S	S	S	S	S	S	S	2	14	14.2857
	6	IND6	S	S	R	S		S	S	1128.29	R	S		S	S	S	S	2	14	14.2857
	28	IND30	S	S	S		R	S	S	1185.39	R	S	S	S	S	S	S	2	14	14.2857
	29	IND31	S	S	S	S	R	S	S	1215.64	R	S	S	S	S	S	S	2	14	14.2857
	40	IND42	S	S	S	S	R	S	S	1017.9		S	R	S	S	S	S	2	14	14.2857
	89	BGD1	S	S	R	S	R			1110.6	S	S	S	S	S	S	S	2	14	14.2857
	169	BGD82	S	S	R	S		S		906.07	S		R	S	S	S	S	2	14	14.2857
	103	BGD15	S	S	S		R	S	R	1037.24		S	S	S	S	S	S	2	14	14.2857
	104	BGD16	S	S			R	S	R	1002.37		S	S	S	S	S	S	2	14	14.2857
	81	IND87	S	S		S	R		R	779.218		S	S			S	S	2	14	14.2857
	45	IND48	S	S	S	S	R	S	R	941.564		S	S		S	S		2	14	14.2857
	49	IND52	S	S	S	R	R	S	S	1052.26			S	S	S	S		2	14	14.2857
	164	BGD77	S		R	S	R		R	788.992	S	S	S	S	S	S	S	3	14	21.4286
	130	BGD43	S		R	S		S	R	791.152	R		S	S	S	S	S	3	14	21.4286
	134	BGD47	S		R	S		S	R	824.897	R		S	S	S	S	S	3	14	21.4286
	42	IND44	S	S	R		R	S		982.922	R	S	S		S	S	S	3	14	21.4286
	3	IND3	S		S	S	R	S	S	1279.84	R	S	R		S	S	S	3	14	21.4286
	77	IND82	S	S	R	S	R		S	1189.81	S		R	S	S	S	S	3	14	21.4286
	145	BGD58	S	R	R	S	R	S		981.79	S	S	S	S	S	S	S	3	14	21.4286
	160	BGD73	S		R	S	R		S	838.683	S		R	S	S	S	S	3	14	21.4286
	59	IND62	S	S	S	S	R	S	S	985.597	R	S	R	S	S	S	S	3	14	21.4286
	76	IND81	S	S	S	S	R	S	S	1061.21	R	S	R	S	S	S	S	3	14	21.4286
	19	IND19	S	S	R	S	R		S	976.749	R	S		S	S	S	S	3	14	21.4286
	50	IND53	S	S	R	S	R	S	R	1012.86	S	S	S	S	S	S	S	3	14	21.4286
	171	BGD84	S		R	S	R	S		746.811	R	S	S	S	S	S	S	3	14	21.4286
	144	BGD57	S		R	S	R	S		1013.68	S		R	S	S	S	S	3	14	21.4286
	111	BGD24	S	R	R	S	R	S		1072.63	S	S		S	S	S	S	3	14	21.4286
	113	BGD26	S	R	R	S	S	S	R	1069.75	S				S	S	S	3	14	21.4286
	118	BGD31	S	S	R	S	R	S		816.872	R				S	S	S	3	14	21.4286
	13	IND13	S		R	S	S	S	R	1137.76	R		S		S	S	S	3	14	21.4286
	147	BGD60	S		R	S		S		1011.32	R	S	R	S	S	S	S	3	14	21.4286
	23	IND25	S	S	S	S	R	S	R	1153.4	S	S	R	S		S	S	3	14	21.4286
	71	IND74	S	S	R	S		S	R	923.457	R	S	S	S	S	S		3	14	21.4286
	74	IND79	S	S	S	S	R	S	S	1130.04	R	S	R	S	S	S		3	14	21.4286
	24	IND26	S	S	S	S	R	S	R	1213.58	R	S		S	S	S		3	14	21.4286
	110	BGD23	S	R	R	S	R	S		1075.93	S	S	S	S	S	S		3	14	21.4286
	53	IND56	S	S		S	R	S	R	920.885	R	S	S	S	S	S		3	14	21.4286
	66	IND69	S	S	R		R		R	1033.02		S	S	S	S	S	S	3	14	21.4286
	18	IND18	S	S	R		R	S		912.654	R		S		S	S	S	3	14	21.4286
	38	IND40	S	S	R	R		S	R	825	S	S	S		S	S		3	14	21.4286
	12	IND12	S	S	R	S	R	S	R	879.938	R	S	S	S	S	S	S	4	14	28.5714
	85	IND91	S	S	R	S		S	R	654.63	R	S	R	S	S	S	S	4	14	28.5714
	98	BGD10	S		R	S	R	S		1187.24	R	S	R	S	S	S	S	4	14	28.5714
	62	IND65	S		R		R	S	R	929.835	R			S	S	S	S	4	14	28.5714
	131	BGD44	S		R	S	R	S	R	705.658	R		S	S	S	S	S	4	14	28.5714
	15	IND15	S	S	R	S	S	S	R	1050.21	S	R	R		S	S	S	4	14	28.5714
	65	IND68	S	S	R	S	R	S	R	1068.83	R	S	S	S	S	S	S	4	14	28.5714
	78	IND84	S	S	R	S	R	R	R	792.798		S		S	S	S	S	4	14	28.5714
	156	BGD69	S	R	R	S	R	S	R	918.827		S	S	S	S	S	S	4	14	28.5714
	127	BGD40	S		R	S	R	S	R	932.202	R	S	S	S	S	S	S	4	14	28.5714
	129	BGD42	S		R	S	R	S	R	775.309	R		S	S	S	S	S	4	14	28.5714
	135	BGD48	S		R	S	R	S	R	761.317	R		S	S	S	S	S	4	14	28.5714
	115	BGD28	S	R	R	S		S		934.568	R	S	R	S	S	S	S	4	14	28.5714
	101	BGD13	S	R	R	S	R	S		1170.47	S		R	S	S	S	S	4	14	28.5714
	172	BGD85	S	R	R	S		S		918.621	R		R	S	S	S	S	4	14	28.5714
	158	BGD71	S	R	R	S	R	S		927.263	R	S	S		S	S	S	4	14	28.5714
	159	BGD72	S	R	R	S	S		R	1006.79	R	S	S		S	S	S	4	14	28.5714
	14	IND14	S	S	R	S	R	S		997.942	R	S	S		R	S	S	4	14	28.5714
	5	IND5	S	S	R	S	S	S	R	990.535	R	S	S	S	R	S	S	4	14	28.5714
	52	IND55	S	S	R	S	S	S	R	904.938	R		S	S	R	S	S	4	14	28.5714
	137	BGD50	S		R		R	S	R	1010.29	R	S		S	S	S		4	14	28.5714
	79	IND85	S	S	R	S	R	S	R	907.099	R	S	S	S	S	S		4	14	28.5714
	47	IND50	S	S	R	S		S	R	862.551	R		R	S	S	S		4	14	28.5714
	120	BGD33	S	S	R	S		S	R	999.383	S	R	R	S	S	S		4	14	28.5714
	151	BGD64	S	R	R	S	R	S		907.51	S		R	S	S	S		4	14	28.5714
	55	IND58	S	S	R	S	S	S	R	1056.58	R		S	S	R	S		4	14	28.5714
	37	IND39	S	S	R	R	R	S	R	1134.57	S	S	S	S	S	S	S	4	14	28.5714
	4	IND4	S	S	R	R	R	S	R	1241.56		S	S		S	S	S	4	14	28.5714
	17	IND17	S	S	R	R		S	R	1075.72	R	S	S		S	S	S	4	14	28.5714
	34	IND36	S	S	R	R	R	S	R	841.358	S	S	S		S	S	S	4	14	28.5714
	54	IND57	S	S	S	R	R	S	R	1075.62	S	R		S	S	S		4	14	28.5714
	162	BGD75	S		R	S	R		R	1080.97	R	R	S	S	S	S	S	5	14	35.7143
	163	BGD76	S	S	R		R	S	R	1120.16	R	R		S	S	S	S	5	14	35.7143
	174	BGD87	S		R	S	R		R	567.49		R	R	S	S	S	S	5	14	35.7143
	108	BGD21	S	R	R	S	R	S	R	938.58		S	R		S	S	S	5	14	35.7143
	93	BGD5	S		R	S	R	S	R	861.317	R	S	R		S	S	S	5	14	35.7143
	143	BGD56	S	R	R	S	R	S		1124.59	R	S	R	S	S	S	S	5	14	35.7143
	154	BGD67	S	R	R	S	R		R	870.988	R	S	S	S	S	S	S	5	14	35.7143
	157	BGD70	S	R	R	S	R		R	984.362	R	S	S	S	S	S	S	5	14	35.7143
	122	BGD35	S	R	R	S	R			803.704	S	R	R	S	S	S	S	5	14	35.7143
	136	BGD49	S		R	S		S	R	957.819	R	R	R	S	S	S	S	5	14	35.7143
	165	BGD78	S	R	R	S	R	S		654.115	S	R	R	S	S	S	S	5	14	35.7143
	97	BGD9	S	R	R	S	R	S	R	1073.05	S	S	R	S	S	S	S	5	14	35.7143
	116	BGD29	S		R	S	R	S	R	921.296	R		R	S	S	S	S	5	14	35.7143
	117	BGD30	S	R	R	S	R	S		869.753	R		R	S	S	S	S	5	14	35.7143
	128	BGD41	S	R	R	S	R	S	R	986.214	R	S	S		S	S	S	5	14	35.7143
	7	IND7	S		R	S	R	S	R	740.123	R	S	R		S	S	S	5	14	35.7143
	1	IND1	S		R	S	R	S	R	942.901	R		R	S	S	S	S	5	14	35.7143
	63	IND66	S		R	S		S	R	866.975	R	S	R	S	R	S	S	5	14	35.7143
	68	IND71	S		R	S	R	S	R	977.778	R				R	S	S	5	14	35.7143
	80	IND86	S		R	S	R		R	596.914	R	S	S		R	S	S	5	14	35.7143
	56	IND59	S	S	R	S	R	S	R	960.185	R		R	S	S		S	5	14	35.7143
	83	IND89	S		R	S	R	S	S	773.971	R	R	R		S		S	5	14	35.7143
	33	IND35	S	S	R	S	R		R	733.642	R	S	S	R	S	S		5	14	35.7143
	102	BGD14	S		R	S	R	S	R	901.955	S	R	R	S	S	S		5	14	35.7143
	114	BGD27	S	R	R	S	R	S	R	997.634	R	S		S	S	S		5	14	35.7143
	43	IND45	S	S	R	S	R	S	R	1079.22		R	R		S	S		5	14	35.7143
	39	IND41	S	S	R	S	R	R	R	561.934		S	R	S	S	S		5	14	35.7143
	107	BGD20	S	S	R	S	R	S	R	922.325	R	S	R	S	S	S		5	14	35.7143
	121	BGD34	S	S	R	S	R	S	R	840.432	S	R	R	S	S	S		5	14	35.7143
	90	BGD2	S	R	R	S	R			705.761	R	S	R	S	S	S		5	14	35.7143
	100	BGD12	S	R	R	S	R	S		855.247	R	S	R	S	S	S		5	14	35.7143
	105	BGD17	S	R	R	S	R	S	S	1080.35	R	S	R	S	S	S		5	14	35.7143
	123	BGD36	S	R	R	S	R	S	R	950.926	R		S		S			5	14	35.7143
	35	IND37	S	S	R	S	R	S	R	808.333	R	S	R	S	S			5	14	35.7143
	109	BGD22	S	R	R	S		S	R	1004.22	R	S	R	S	S			5	14	35.7143
	11	IND11	S	S	R	R	R	S		739.403	R	S	S	S	S	S	R	5	14	35.7143
	10	IND10	S	S	R	R	R	S	R	637.551	R	S	S	S	S	S	S	5	14	35.7143
	64	IND67	S	S	R	R	R	S	R	1087.24	R	S	S		S	S	S	5	14	35.7143
	73	IND76	S	S	R	R	R	S		1038.89	R	S	R		S	S		5	14	35.7143
	94	BGD6	S		S	R	R	S	R	939.609	R	S	R	S	S	S	R	6	14	42.8571
	61	IND64	S	S	R	S	R	S	R	683.951	R	R	R	S	S	S	S	6	14	42.8571
	106	BGD19	S		R	S	R	S	R	800.72	R	R	R	S	S	S	S	6	14	42.8571
	99	BGD11	S	R	R	S	R		R	771.193	R	S	R	S	S	S	S	6	14	42.8571
	70	IND73	S		R	S	R	S	R	880.041	R	R	R		S	S	S	6	14	42.8571
	32	IND34	S	S	R	S	R		R	756.996	R	R	R		S	S	S	6	14	42.8571
	149	BGD62	S		R	S	R	S	R	986.728	R	R	R		S	S	S	6	14	42.8571
	46	IND49	S	S	R	S	R	S	R	916.255	R	R	R	S	S	S	S	6	14	42.8571
	166	BGD79	S	R	R	S	R	S	R	669.136	S	R	R	S	S	S	S	6	14	42.8571
	167	BGD80	S	R	R	S	R		R	701.646	S	R	R	S	S	S	S	6	14	42.8571
	168	BGD81	S	R	R		R	S	R	602.675	S	R	R	S	S	S	S	6	14	42.8571
	148	BGD61	S	R	R	S	R	S	R	865.226	R	S	R	S	S	S	S	6	14	42.8571
	44	IND46	S	S	R	S	R		R	877.469	R	R	R		S	S	S	6	14	42.8571
	31	IND33	S	S	R	S	R	S	R	811.728	R	R	R		S	S	S	6	14	42.8571
	22	IND22	S		R	S	R		R	730.556	R	S	R	S	R	S	S	6	14	42.8571
	26	IND28	S		R	S	R	S	R	740.123	R		R		R	S	S	6	14	42.8571
	67	IND70	S	S	R	S		S	R	866.667	R	R	R		R	S	S	6	14	42.8571
	84	IND90	S	S	R	S	R	S	R	917.284	R	R	R			S	S	6	14	42.8571
	20	IND20	S	S	R	S	R	R	R	859.877	R	S	R	S	S		S	6	14	42.8571
	82	IND88	R	S	S	S	R	S	R	606.173	R	S	S	R	S	R		6	14	42.8571
	161	BGD74	S	R	R	S	R	S	R	767.593	R	S	R	S	S	S		6	14	42.8571
	155	BGD68	S	R	R	S		S	R	848.56	R	R	R	S	S	S		6	14	42.8571
	125	BGD38	S		R	S	R	S		1020.78	R	R	R	S	R	S		6	14	42.8571
	126	BGD39	S		R	S		S	R	827.984	R	R	R		R	S		6	14	42.8571
	87	IND93	S		R	S	R	S	R	623.868	R	R	R	S		S		6	14	42.8571
	9	IND9	R	S	R	R	R	S	R	666.461	R	S	S		S	S	S	6	14	42.8571
	124	BGD37	S	R	R			S	R	848.457	R	R	R		S	S	S	6	14	42.8571
	173	BGD86	S	R	R	R	R	S	R	486.214			R	S	S	S	S	6	14	42.8571
	36	IND38	S	S	R	S	R	S	R	799.074	R	R	R	S	S	R	S	7	14	50
	176	BGD89	S	R	R		R		R	847.84	R	S	S	S	R	R	S	7	14	50
	91	BGD3	S	R	R	S	R	S	R	998.971	R	R	R	S	S	S	S	7	14	50
	25	IND27	S		R	S	R	S	R	693.827	R	R	R	S	R	S	S	7	14	50
	181	BGD94	S	R	R	S		S	R	728.909	R	R	R		R	S	S	7	14	50
	21	IND21	S		R	S	R	S	R	621.193	R	R	R	S	R	S		7	14	50
	30	IND32	S	S	R	S	R		R	667.078	R	R	R	S	R	S		7	14	50
	2	IND2	S	S	R	S	R	S	R	747.737	R	R	R		R	S		7	14	50
	178	BGD91	S	R	R	S		R	R	689.712	R	S	R	S	R	S		7	14	50
	16	IND16	S		R	R	R	S	R	588.889	R	R	R	S	S	S	S	7	14	50
	177	BGD90	S	R	R	S	R	S	R	534.259	R		R	S	R	S	R	8	14	57.1429
	27	IND29	S	R	R		R	R	R	548.457	R		S	R	R	S	S	8	14	57.1429
	150	BGD63	S	R	R	S	R	S	R	927.16	R	R	R	S	R	S	S	8	14	57.1429
	96	BGD8	S	R	R	S	R	S	R	772.942	R	R	R	S	R	S	S	8	14	57.1429
	179	BGD92	S	R	R	S	R	S	R	799.691	R	R	R	S	R	S	S	8	14	57.1429
	41	IND43	S	S	R	S	R	R	R	576.029	R	R	R	S	R	S	S	8	14	57.1429
	8	IND8	R	S	R	S	R	S	R	372.428	R	S	R	R	S	R		8	14	57.1429
	133	BGD46	R	R	R	S	R	S	R	960.494	R	R	R		S			8	14	57.1429
	152	BGD65	R	R	R	R	R	S		559.259	R	S	R	R	S	S	S	8	14	57.1429
	86	IND92	S	S	R	R	R	R	R	370.267	R	R		S	R	S	S	8	14	57.1429
	175	BGD88	S	R	R	R	R	S	R	647.222	R		R		R	S	S	8	14	57.1429
	138	BGD51	R	R	R	R	R			555.041			R	R	S	R		8	14	57.1429
	141	BGD54	R	R	R	R	R	S		369.856	R	S	R		S	R		8	14	57.1429
	153	BGD66	R	R	R	R	R	S		541.461	R	S	R	R	S	S		8	14	57.1429
	180	BGD93	S	R	R		R	R	R	574.897	R	R	R		S	S	R	9	14	64.2857
	69	IND72	S	R	R	S	R	R	R	495.885	R	R	R	R	R	S	S	10	14	71.4286
	142	BGD55	R	R	R	R	R	S		567.387	R	S	R	R	S	R	R	10	14	71.4286
	140	BGD53	R	R	R	R	R	S		579.012	R		R	R	S	R	R	10	14	71.4286
	72	IND75	S	R	R	R	R	R	R	484.156	R		R	R	R	S	S	10	14	71.4286
	139	BGD52	R	R	R	R	R		R	356.584	R	R	R	S	S	R	R	11	14	78.5714
			11	57	157	25	145	10	120		125	48	100	11	29	9	7
			169	79	20	141	8	141	19		36	96	64	125	146	164	128
			180	136	177	166	153	151	139		161	144	164	136	175	173	135
	Frequency of resistant allel		6.11111	41.9118	88.7006	15.0602	94.7712	6.62252	86.3309		77.6398	33.3333	60.9756	8.08824	16.5714	5.20231	5.18519
			Total allel screened									1946					Total resistant allele	854
																	Percent resistant/favourable allels	43.8849
